# Supplementary material for: Individual-Level Determinants of Lifestyle Behavioral Changes during COVID-19 Lockdown in the United States: Results of an Online Survey
Source: MDPI journal article supplement (doi:10.3390/ijerph18084364), 2021-04-20
Supplement: s1 [file s1]

**Table S1.** Associations between individual level determinants and healthy behavior change (physical activity and healthy eating)

|                         |                      | Physical activity |              |               |         | Healthy eating      |                     |               |         |
|-------------------------|----------------------|-------------------|--------------|---------------|---------|---------------------|---------------------|---------------|---------|
|                         |                      | PA decreased      | PA increased | Stay the same | p-value | Eating less healthy | Eating more healthy | Stay the same | p-value |
| Age                     | Mean (SD)            | 48.6 (16.60)      | 42.4 (15.8)  | 47.2 (17.5)   | 0.23    | 46.1 (16.3)         | 43.9 (16.1)         | 48.9 (17.5)   | 0.15    |
| Gender                  |                      |                   |              |               | <0.01   |                     |                     |               | 0.21    |
|                         | Male                 | 180 (40.3)        | 147 (32.9)   | 120 (26.9)    |         | 126 (28.3)          | 174 (39.0)          | 146 (32.7)    |         |
|                         | Female               | 134 (27.3)        | 248 (50.5)   | 109 (22.2)    |         | 156 (31.7)          | 165 (33.5)          | 171 (34.8)    |         |
| Race                    |                      |                   |              |               | <0.01   |                     |                     |               | 0.18    |
|                         | White                | 144 (27.4)        | 254 (48.3)   | 128 (24.3)    |         | 174 (33.1)          | 172 (32.7)          | 180 (34.2)    |         |
|                         | Black                | 89 (46.8)         | 54 (28.4)    | 47 (24.7)     |         | 49 (25.9)           | 74 (39.2)           | 66 (34.9)     |         |
|                         | Hispanic             | 43 (36.1)         | 43 (36.1)    | 33 (26.5)     |         | 32 (26.7)           | 46 (38.3)           | 42 (35.0)     |         |
|                         | Asian                | 12 (35.3)         | 13 (38.2)    | 9 (26.5)      |         | 6 (18.2)            | 16 (48.5)           | 11 (33.3)     |         |
|                         | Other                | 29 (34.9)         | 35 (42.2)    | 19 (22.9)     |         | 25 (29.8)           | 37 (44.1)           | 22 (26.2)     |         |
| Education               |                      |                   |              |               | <0.01   |                     |                     |               | 0.10    |
|                         | Not College Educated | 43 (24.3)         | 77 (43.5)    | 57 (32.2)     |         | 63 (35.4)           | 53 (29.8)           | 62 (34.8)     |         |
|                         | College Educated     | 275 (35.3)        | 325 (41.7)   | 179 (23.0)    |         | 225 (28.9)          | 292 (37.5)          | 261 (33.6)    |         |
| Marital status          |                      |                   |              |               | 0.03    |                     |                     |               | 0.02    |
|                         | Unmarried            | 136 (29.2)        | 206 (44.2)   | 124 (26.6)    |         | 148 (31.9)          | 146 (31.5)          | 170 (36.6)    |         |
|                         | Married              | 182 (37.1)        | 195 (39.8)   | 113 (23.1)    |         | 140 (28.5)          | 198 (40.2)          | 154 (31.3)    |         |
| Annual Household Income |                      |                   |              |               | <0.01   |                     |                     |               | 0.49    |
|                         | Less than \$25K      | 40 (22.6)         | 89 (50.3)    | 48 (27.1)     |         | 55 (30.9)           | 58 (32.60)          | 65 (36.5)     |         |
|                         | \$25K to \$74K       | 104 (28.7)        | 157 (73.4)   | 101 (27.9)    |         | 114 (31.6)          | 124 (34.4)          | 123 (34.1)    |         |
|                         | \$75K or more        | 163 (42.2)        | 148 (38.3)   | 75 (19.4)     |         | 110 (28.5)          | 152 (39.4)          | 124 (32.1)    |         |

|                               |                                     |             |             |             |       |             |             |             |        |
|-------------------------------|-------------------------------------|-------------|-------------|-------------|-------|-------------|-------------|-------------|--------|
| Living arrangement            |                                     |             |             |             | 0.22  |             |             |             | 0.01   |
|                               | Living alone                        | 50 (27.9)   | 78 (43.6)   | 51 (28.5)   |       | 58 (32.6)   | 49 (27.5)   | 71 (39.9)   |        |
|                               | Living with spouse/romantic partner | 185 (36.1)  | 209 (40.8)  | 118 (23.1)  |       | 148 (28.9)  | 199 (38.8)  | 166 (32.4)  |        |
|                               | Living with a family member         | 60 (29.3)   | 87 (42.4)   | 58 (28.3)   |       | 53 (25.9)   | 83 (40.5)   | 69 (33.7)   |        |
|                               | Living with a non-family member     | 16 (38.1)   | 19 (45.2)   | 7 (16.7)    |       | 2 (47.6)    | 11 (26.2)   | 11 (26.2)   |        |
| Number of household residents |                                     |             |             |             | 0.34  |             |             |             | 0.03   |
|                               | 1                                   | 59 (30.4)   | 82 (42.3)   | 53 (27.3)   |       | 63 (32.5)   | 55 (28.4)   | 76 (39.2)   |        |
|                               | 2                                   | 94 (30.2)   | 141 (45.3)  | 76 (24.4)   |       | 85 (27.2)   | 111 (35.6)  | 116 (37.2)  |        |
|                               | 3~4                                 | 129 (38.2)  | 132 (39.1)  | 77 (22.8)   |       | 109 (32.3)  | 129 (38.3)  | 99 (29.4)   |        |
|                               | 5 or more                           | 35 (32.1)   | 44 (40.4)   | 30 (27.5)   |       | 30 (27.5)   | 49 (45.0)   | 30 (27.5)   |        |
| Lives with someone > age 65   |                                     |             |             |             | 0.055 |             |             |             | 0.07   |
|                               | Yes                                 | 59 (28.5)   | 98 (47.3)   | 50 (24.2)   |       | 64 (30.8)   | 67 (32.2)   | 77 (37.0)   |        |
|                               | No                                  | 205 (37.2)  | 215 (39.0)  | 131 (23.8)  |       | 158 (28.7)  | 226 (41.0)  | 167 (30.3)  |        |
| Lives with child < age 18     |                                     |             |             |             | <0.01 |             |             |             | <0.01  |
|                               | Yes                                 | 136 (41.2)  | 111 (33.6)  | 83 (25.2)   |       | 90 (27.3)   | 148 (44.9)  | 92 (27.9)   |        |
|                               | No                                  | 124 (29.1)  | 202 (47.4)  | 100 (23.5)  |       | 131 (30.7)  | 143 (33.5)  | 153 (35.8)  |        |
| Work status                   |                                     |             |             |             | <0.01 |             |             |             | <0.01  |
|                               | Working full time                   | 192 (42.8)  | 149(33.2)   | 108 (24.1)  |       | 127 (28.2)  | 200 (44.4)  | 124 (27.5)  |        |
|                               | Working part time                   | 44 (34.9)   | 51 (40.5)   | 31 (24.6)   |       | 38 (30.4)   | 45 (36.0)   | 42 (33.6)   |        |
|                               | Retired                             | 28 (17.5)   | 87 (54.4)   | 45 (28.1)   |       | 51 (31.9)   | 37 (23.1)   | 72 (45.0)   |        |
|                               | Unemployed                          | 53 (24.4)   | 112 (51.6)  | 52 (24.0)   |       | 71 (32.9)   | 62 (28.7)   | 83 (38.4)   |        |
| Anxiety                       |                                     |             |             |             | 0.49  |             |             |             | 0.6209 |
|                               | Mean (SD)                           | 59.6 (10.9) | 58.8 (10.5) | 59.6 (10.9) |       | 59.7 (10.8) | 59.4 (10.8) | 57.7 (10.3) |        |

|                                            |           |             |             |             |      |             |             |            |        |
|--------------------------------------------|-----------|-------------|-------------|-------------|------|-------------|-------------|------------|--------|
|                                            | Yes       | 141 (33.3)  | 185 (43.7)  | 97 (22.9)   |      | 127 (30.1)  | 158 (37.4)  | 137 (32.5) |        |
|                                            | No        | 158 (34.1)  | 186 (40.2)  | 119 (25.7)  |      | 137 (29.6)  | 162 (35.0)  | 164 (35.4) |        |
| <b>Depression</b>                          |           |             |             |             | 0.85 |             |             |            | 0.0578 |
|                                            | Mean (SD) | 56.5 (10.1) | 55.8 (10.4) | 56.5 (10.1) |      | 57.1 (10.4) | 56.4 (10.1) | 54.9 (9.7) |        |
|                                            | Yes       | 112 (32.4)  | 149 (43.1)  | 85 (24.6)   |      | 118 (34.0)  | 125 (36.0)  | 104 (30.0) |        |
|                                            | No        | 185 (34.2)  | 226 (41.8)  | 130 (24.0)  |      | 148 (27.5)  | 194 (36.0)  | 197 (36.6) |        |
| <b>Stay at home adherence</b>              |           |             |             |             |      |             |             |            |        |
|                                            | Mean (SD) | 8.4 (2.0)   | 8.5 (1.7)   | 8.3 (2.0)   | 0.76 | 8.1 (2.1)   | 8.7 (1.7)   | 8.4 (1.80) | 0.92   |
| <b>Social distancing adherence</b>         |           |             |             |             |      |             |             |            |        |
|                                            | Mean (SD) | 8.2 (2.1)   | 8.5 (1.7)   | 8.0 (2.2)   | 0.06 | 7.8 (2.3)   | 8.6 (1.7)   | 8.2 (2.0)  | 0.49   |
| <b>Hand hygiene/sanitization adherence</b> |           |             |             |             |      |             |             |            |        |
|                                            | Mean (SD) | 8.2 (2.0)   | 7.8 (2.4)   | 7.9 (2.2)   | 0.41 | 7.7 (2.4)   | 8.3 (2.0)   | 7.9 (2.3)  | 0.13   |

**Table S2.** Associations between individual level determinants and addictive behavior change (tobacco smoking, alcohol use and vaping)

|                         |                      | Tobacco Smoking   |                   |               |         | Alcohol Consumption        |                            |               |         | Vaping           |                  |               |         |
|-------------------------|----------------------|-------------------|-------------------|---------------|---------|----------------------------|----------------------------|---------------|---------|------------------|------------------|---------------|---------|
|                         |                      | Smoking increased | Smoking decreased | Stay the same | p-value | Alcohol drinking increased | Alcohol drinking decreased | Stay the same | p-value | Vaping increased | Vaping decreased | Stay the same | p-value |
| Age                     | Mean (SD)            | 41.8 (14.8)       | 40.2 (12.6)       | 46.4 (15.3)   | 0.64    | 41.4 (13.1)                | 41.0 (15.4)                | 50.7 (17.3)   | 0.85    | 35.2 (10.4)      | 38.4 (12.1)      | 38.3 (12.1)   | 0.30    |
| Gender                  |                      |                   |                   |               | 0.12    |                            |                            |               | 0.054   |                  |                  |               | 0.74    |
|                         | Male                 | 59 (37.1)         | 37 (23.3)         | 63 (39.6)     |         | 115 (39.4)                 | 56 (19.2)                  | 121 (41.4)    |         | 52 (45.6)        | 23 (20.2)        | 39 (34.2)     |         |
|                         | Female               | 36 (49.3)         | 10 (13.7)         | 27 (37.0)     |         | 97 (38.5)                  | 31 (12.3)                  | 124 (49.2)    |         | 20 (42.6)        | 8 (17.0)         | 19 (40.4)     |         |
| Race                    |                      |                   |                   |               | 0.46    |                            |                            |               | 0.17    |                  |                  |               | 0.58    |
|                         | White                | 40 (37.7)         | 21 (19.8)         | 45 (42.5)     |         | 115 (38.5)                 | 39 (13.0)                  | 145 (48.5)    |         | 30 (48.4)        | 8 (12.9)         | 24 (38.7)     |         |
|                         | Black                | 37 (42.5)         | 16 (18.4)         | 34 (39.1)     |         | 59 (45.4)                  | 21 (16.2)                  | 50 (38.5)     |         | 24 (47.1)        | 13 (25.5)        | 14 (27.5)     |         |
|                         | Hispanic             | 8 (36.4)          | 8 (36.4)          | 6 (27.3)      |         | 19 (31.7)                  | 16 (26.7)                  | 25 (41.7)     |         | 17 (43.6)        | 8 (20.5)         | 14 (35.9)     |         |
|                         | Asian                | 1 (33.3)          | 1 (33.3)          | 1 (33.3)      |         | 4 (28.6)                   | 3 (21.4)                   | 7 (50.0)      |         | 1 (25.0)         | 1 (25.0)         | 2 (50.0)      |         |
|                         | Other                | 12 (57.1)         | 2 (9.5)           | 7 (33.3)      |         | 21 (43.8)                  | 8 (16.7)                   | 19 (39.6)     |         | 6 (42.9)         | 1 (7.1)          | 7 (50.0)      |         |
| Education               |                      |                   |                   |               | 0.90    |                            |                            |               | 0.20    |                  |                  |               | 0.20    |
|                         | Not College Educated | 27 (42.9)         | 13 (20.6)         | 23 (36.5)     |         | 30 (34.9)                  | 19 (22.1)                  | 37 (43.0)     |         | 20 (40.8)        | 13 (26.5)        | 16 (32.7)     |         |
|                         | College Educated     | 71 (40.3)         | 35 (19.9)         | 70 (39.8)     |         | 188 (40.3)                 | 68 (14.6)                  | 210 (45.1)    |         | 58 (47.9)        | 18 (14.9)        | 45 (37.2)     |         |
| Marital status          |                      |                   |                   |               | 0.02    |                            |                            |               | 0.02    |                  |                  |               | 0.26    |
|                         | Unmarried            | 57 (43.5)         | 18 (13.7)         | 56 (42.8)     |         | 101 (39.6)                 | 51 (20.0)                  | 103 (40.4)    |         | 32 (40.0)        | 15 (18.8)        | 33 (41.3)     |         |
|                         | Married              | 41 (38.3)         | 30 (28.0)         | 36 (33.6)     |         | 117 (39.4)                 | 36 (12.1)                  | 144 (48.5)    |         | 46 (51.7)        | 16 (18.0)        | 27 (30.3)     |         |
| Annual Household Income |                      |                   |                   |               | 0.39    |                            |                            |               | 0.66    |                  |                  |               | 0.996   |
|                         | Less than \$25K      | 22 (46.8)         | 8 (17.0)          | 17 (36.2)     |         | 24 (35.3)                  | 13 (19.1)                  | 31 (45.6)     |         | 12 (48.0)        | 4 (16.0)         | 9 (36.0)      |         |
|                         | \$25K to \$74K       | 39 (41.5)         | 14 (14.9)         | 41 (43.6)     |         | 81 (39.1)                  | 28 (13.5)                  | 98 (47.3)     |         | 32 (47.1)        | 13 (19.1)        | 23 (33.8)     |         |
|                         | \$75K or more        | 36 (39.6)         | 23 (25.3)         | 32 (35.2)     |         | 107 (41.2)                 | 43 (16.5)                  | 110 (42.3)    |         | 33 (45.8)        | 13 (18.1)        | 26 (36.1)     |         |

|                               |                                     |           |           |           |       |            |           |            |       |           |           |            |      |
|-------------------------------|-------------------------------------|-----------|-----------|-----------|-------|------------|-----------|------------|-------|-----------|-----------|------------|------|
| Living arrangement            |                                     |           |           |           | 0.74  |            |           |            | 0.02  |           |           |            | 0.94 |
|                               | Living alone                        | 15 (33.3) | 10 (22.2) | 20 (44.4) |       | 27 (30.7)  | 18 (20.5) | 43 (48.9)  |       | 13 (43.3) | 8 (26.7)  | 9 (30.0)   |      |
|                               | Living with spouse/romantic partner | 51 (42.5) | 23 (19.2) | 46 (38.3) |       | 125 (38.5) | 41 (12.6) | 159 (48.9) |       | 40 (45.5) | 15 (17.1) | 33 (37.50) |      |
|                               | Living with a family member         | 19 (35.9) | 11 (20.8) | 23 (43.4) |       | 44 (44.4)  | 22 (22.2) | 33 (33.3)  |       | 17 (46.0) | 6 (16.2)  | 14 (37.8)  |      |
|                               | Living with a non-family member     | 9 (56.3)  | 3 (18.8)  | 4 (25.0)  |       | 13 (52.0)  | 4 (16.0)  | 8 (32.0)   |       | 4 (40.0)  | 2 (20.0)  | 4 (40.0)   |      |
| Number of household residents |                                     |           |           |           | 0.32  |            |           |            | 0.01  |           |           |            | 0.62 |
|                               | 1                                   | 17 (34.7) | 11 (22.9) | 21 (22.8) |       | 31 (31.3)  | 21 (21.2) | 47 (47.5)  |       | 13 (41.9) | 8 (25.8)  | 10 (32.2)  |      |
|                               | 2                                   | 30 (39.0) | 12 (25.0) | 35 (38.0) |       | 61 (33.9)  | 28 (15.6) | 91 (50.6)  |       | 14 (35.0) | 8 (20.0)  | 18 (45.0)  |      |
|                               | 3~4                                 | 39 (42.4) | 23 (47.9) | 30 (32.6) |       | 102 (47.9) | 25 (11.7) | 86 (40.4)  |       | 40 (51.3) | 12 (15.4) | 26 (33.3)  |      |
|                               | 5 or more                           | 11 (57.9) | 2 (10.5)  | 6 (31.6)  |       | 23 (40.4)  | 12 (22.8) | 21 (36.8)  |       | 10 (50.0) | 3 (15.0)  | 7 (35.0)   |      |
| Lives with someone > age 65   |                                     |           |           |           | 0.76  |            |           |            | <0.01 |           |           |            | 0.53 |
|                               | Yes                                 | 23 (46.0) | 9 (18.0)  | 18 (36.0) |       | 32 (27.8)  | 12 (10.4) | 71 (61.7)  |       | 13 (48.2) | 6 (22.2)  | 8 (29.6)   |      |
|                               | No                                  | 56 (40.0) | 29 (20.7) | 55 (39.3) |       | 151 (44.9) | 56 (16.7) | 129 (38.4) |       | 49 (44.6) | 17 (15.5) | 44 (40.0)  |      |
| Lives with child < age 18     |                                     |           |           |           | 0.41  |            |           |            | <0.01 |           |           |            | 0.51 |
|                               | Yes                                 | 41 (44.6) | 20 (21.7) | 31 (33.7) |       | 100 (50.5) | 27 (13.6) | 71 (35.9)  |       | 41 (48.2) | 15 (17.7) | 29 (34.1)  |      |
|                               | No                                  | 37 (39.0) | 17 (17.9) | 41 (43.2) |       | 83 (32.8)  | 41 (16.2) | 129 (51.0) |       | 21 (42.0) | 7 (14.0)  | 22 (44.0)  |      |
| Work status                   |                                     |           |           |           | 0.33  |            |           |            | <0.01 |           |           |            | 0.29 |
|                               | Working full time                   | 57 (41.9) | 32 (23.5) | 47 (34.6) |       | 139 (44.7) | 55 (17.7) | 117 (37.6) |       | 53 (44.5) | 21 (17.7) | 45 (37.8)  |      |
|                               | Working part time                   | 14 (48.3) | 5 (17.2)  | 10 (34.5) |       | 27 (43.6)  | 8 (12.9)  | 27 (43.6)  |       | 13 (61.9) | 4 (19.1)  | 4 (19.1)   |      |
|                               | Retired                             | 6 (27.3)  | 3 (13.6)  | 13 (59.1) |       | 11 (14.7)  | 7 (9.3)   | 57 (76.0)  |       | 0 (0.0)   | 1 (25.0)  | 3 (75.0)   |      |
|                               | Unemployed                          | 20 (39.2) | 8 (15.7)  | 23 (45.1) |       | 41 (40.2)  | 17 (16.7) | 44 (43.1)  |       | 12 (46.2) | 5 (19.2)  | 9 (34.6)   |      |
| Anxiety                       |                                     |           |           |           | <0.01 |            |           |            | <0.01 |           |           |            | 0.03 |

|                                     |           |            |            |             |       |            |             |            |       |            |            |            |      |
|-------------------------------------|-----------|------------|------------|-------------|-------|------------|-------------|------------|-------|------------|------------|------------|------|
|                                     | Mean (SD) | 65.6 (8.8) | 60.4 (9.4) | 56.6 (11.2) |       | 62.7 (9.2) | 59.8 (10.6) | 57.4 (9.9) |       | 66.4 (8.7) | 61.1 (9.3) | 62.1 (9.9) |      |
|                                     | Yes       | 67 (52.3)  | 22 (17.2)  | 39 (30.5)   |       | 133 (51.6) | 37 (14.3)   | 88 (34.1)  |       | 57 (52.8)  | 17 (15.7)  | 34 (31.5)  |      |
|                                     | No        | 24 (25.8)  | 22 (23.7)  | 47 (50.5)   |       | 70 (27.9)  | 40 (15.9)   | 141 (56.2) |       | 15 (30.6)  | 13 (26.5)  | 21 (42.9)  |      |
| Depression                          |           |            |            |             | <0.01 |            |             |            | <0.01 |            |            |            | 0.04 |
|                                     | Mean (SD) | 63.4 (8.6) | 58.5 (8.0) | 55.4 (10.1) |       | 59.8 (9.6) | 56.7 (10.1) | 53.5 (9.9) |       | 63.3 (8.8) | 60.0 (7.9) | 60.2 (9.4) |      |
|                                     | Yes       | 59 (53.2)  | 20 (18.0)  | 32 (28.8)   |       | 105 (50.2) | 33 (15.8)   | 71 (34.0)  |       | 50 (54.4)  | 14 (15.2)  | 28 (30.4)  |      |
|                                     | No        | 32 (29.1)  | 23 (20.9)  | 55 (50.0)   |       | 100 (33.0) | 42 (13.9)   | 161 (53.1) |       | 22 (33.9)  | 16 (24.6)  | 27 (41.5)  |      |
| Stay at home adherence              |           |            |            |             |       |            |             |            |       |            |            |            |      |
|                                     | Mean (SD) | 8.4 (2.0)  | 8.3 (2.0)  | 8.6 (1.4)   | 0.97  | 8.3 (2.1)  | 8.6 (1.3)   | 8.4 (1.7)  | 0.63  | 8.7 (1.5)  | 8.5 (1.6)  | 8.3 (2.1)  | 0.73 |
| Social distancing adherence         |           |            |            |             |       |            |             |            |       |            |            |            |      |
|                                     | Mean (SD) | 7.8 (2.2)  | 7.8 (2.2)  | 7.9 (2.2)   | 0.43  | 8.3 (2.0)  | 8.2 (1.7)   | 8.1 (2.0)  | 0.03  | 8.2 (2.1)  | 7.9 (2.0)  | 7.9 (2.2)  | 0.14 |
| Hand hygiene/sanitization adherence |           |            |            |             |       |            |             |            |       |            |            |            |      |
|                                     | Mean (SD) | 8.3 (1.9)  | 7.8 (2.1)  | 7.8 (2.2)   | 0.78  | 8.0 (2.2)  | 7.8 (2.1)   | 7.9 (2.3)  | 0.82  | 8.3 (1.8)  | 7.3 (2.3)  | 8.2 (2.1)  | 0.46 |
